# Supplementary material for: Newly synthesized 6-substituted piperazine/phenyl-9-cyclopentyl containing purine nucleobase analogs act as potent anticancer agents and induce apoptosis via inhibiting Src in hepatocellular carcinoma cells
Source: Royal Society of Chemistry journal article supplement (doi:10.1039/d3md00440f), 2023-01-01
Supplement: d3md00440f1.pdf [file d3md00440f1.pdf]

## Supplementary Material

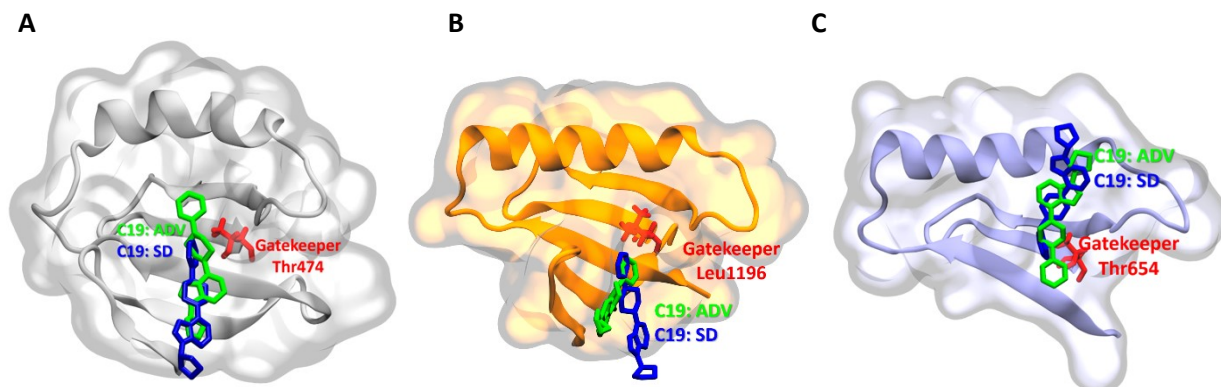

**Figure S1.** Compound 19's posed on the BTK (A), ALK (B), and DDR2 (C) to compare docking applications. The green and blue color show compound 19 poses in the active site of kinases. The red color shows the gatekeepers. ADV: AutoDock Vina, SD: SwissDock.

**Table S1.** The interactions between BTK and tested compounds, with the occupied binding pockets. The binding affinities of SwissDock are specified at the end of the table to compare the binding affinities of AutoDock Vina. FP: Front Pocket, GA: Gate Area, BL: Back Loop, BP: Back Pocket, GK: Gatekeeper, AL: Activation Loop.

| BTK / 5P9J          | Compounds |      |      |      |       |   |               |
|---------------------|-----------|------|------|------|-------|---|---------------|
| Residues            | 19        | 21   | 22   | 23   | 56*   |   |               |
| Leu408              | ✓         | ✓    | ✓    | ✓    | ✓     | : | FP I          |
| Val416              |           |      |      |      | ✓     | : | FP II         |
| Lys430              | ✓         | ✓    |      |      | ✓     | : | GA            |
| Val458              |           | ✓    | ✓    | ✓    |       | : | BL            |
| Leu460              | ✓         | ✓    |      | ✓    |       | : | BP IV         |
| Ile472              | ✓         | ✓    | ✓    | ✓    |       | : | BP V          |
| Thr474              | ✓         | ✓    | ✓    | ✓    | ✓     | : | GK            |
| Tyr476              |           |      |      |      | ✓     | : | Hinge         |
| Leu528              |           |      |      |      | ✓     | : | FP VII        |
| Phe540              |           | ✓    |      | ✓    |       | : | D[F]G         |
| Leu542              | ✓         |      |      |      | ✓     | : | AL            |
| Affinity (kcal/mol) | -9.2      | -8.3 | -9.3 | -9.1 | -10.3 | : | Autodock Vina |
|                     | -7.9      | -8.2 | -8.0 | 8.1  | -8.7  | : | SwissDock     |
